# Supplementary material for: Sudden cardiac death and pump failure death prediction in chronic heart failure by combining ECG and clinical markers in an integrated risk model
Source: PLoS One. 2017 Oct 11;12(10):e0186152. doi: 10.1371/journal.pone.0186152 (PMC5636125; doi:10.1371/journal.pone.0186152)
Supplement: S2 Appendix — (DOCX) [file pone.0186152.s002.docx]

**S2 Appendix: Final models**

SCD prediction models were calculated as follows:

Clinical:

ECG:

Combined:

PFD prediction models were:

Clinical:

ECG:

Combined:
