# Supplementary material for: Sudden cardiac death and pump failure death prediction in chronic heart failure by combining ECG and clinical markers in an integrated risk model
Source: PLoS One. 2017 Oct 11;12(10):e0186152. doi: 10.1371/journal.pone.0186152 (PMC5636125; doi:10.1371/journal.pone.0186152)
Supplement: S6 Table — (XLSX) [file pone.0186152.s008.xlsx]

## Sheet: Results101014_Julia
NYHA	LVEF	Isq	Age	Sex	Diabetes	Amiodarone	ARB or ACE	Beta-blockers	QRS>120	CIA	DeltaAlphaQT	DeltaAlphaTpe	TS	IAA	TMR
2	48	1	71	0	1	0	0	1	0	0	0.198968	0.103008	1.738	2.15479	0.0937948
2	27	1	68	0	0	0	1	0	1	0	0.173716	0.028966	8.875	2.15927	0.0110525
2	55	1	68	1	0	0	1	1	0	0	0.188128	0.041392	5.3	3.04571	0.044187
2	40	1	53	1	0	0	1	1	0	1	0.229992	0.00879804	2.926	2.65882	0.0573038
2	25	1	60	1	1	0	1	1	0	0	0.227637	-0.0168579	1.68	1.81501	0.0373593
2	35	1	54	1	1	0	1	1	0	0	0.289241	0.0296825	2	4.66119	0.0326143
2	17	0	56	1	0	0	1	1	1	1	0.260194	0.0263908	4.631	4.63327	0.0335412
2	45	1	73	1	0	0	1	1	0	0	0.227471	0.0213176	3.2	1.60184	0.037752
2	30	1	58	0	1	0	1	1	1	0	0.171539	0.0502201	8.178	3.63655	0.0342197
2	30	0	69	1	0	1	1	1	1	0	-0.0930654	-0.00815687	5.175	2.65852	0.0320669
2	35	1	69	1	0	0	1	1	0	0	0.264747	0.0185823	10.857	3.95207	0.0768194
2	43	1	63	1	1	0	1	1	0	1	0.16212	0.0101077	3.03	2.4671	0.027907
2	25	1	78	1	0	0	1	1	0	0	0.167157	-0.0085779	2.833	3.26952	0.0494643
2	24	1	50	1	1	0	1	1	0	1	0.16735	0.0187236	3.899	2.0802	0.0404049
3	20	1	58	1	0	1	1	1	1	0	0.316737	0.0530266	1.55	1.81884	0.0330466
2	35	0	72	0	1	0	1	1	1	1	0.216656	-0.00181037	1.953	6.3899	0.0333433
2	30	0	63	0	1	0	1	1	0	0	0.338763	0.131202	2.542	2.72033	0.012718
2	56	0	80	1	0	0	1	0	1	0	0.206191	0.0123417	2.25	4.30955	0.0388796
2	42	0	72	0	0	0	1	0	0	0	0.335312	0.0715625	2.542	2.58466	0.0545486
2	26	0	56	0	0	0	1	0	0	1	0.248297	0.0207732	1.893	2.52987	0.0337607
3	27	1	53	1	0	0	1	0	1	1	0.270347	0.0146259	2.375	2.34957	0.0621296
2	70	0	72	1	0	0	0	0	0	0	0.155863	0.00283587	5.256	3.80181	0.0377273
2	22	1	54	1	1	0	1	1	0	1	0.230958	0.0338596	0.857	3.42815	0.0234848
2	30	0	67	0	1	0	1	1	0	0	0.158106	0.00819338	3.365	1.71357	0.075
2	25	1	60	1	0	0	1	1	0	0	0.212118	0.0121683	8.606	2.1361	0.0479532
2	20	1	51	1	0	0	1	1	0	0	0.200418	0.0300969	5.164	3.3016	0.0506847
2	35	1	67	0	0	0	1	1	0	0	0.243961	0.0424147	6.625	3.53854	0.0523702
2	30	1	64	1	1	0	1	1	0	0	0.266313	0.0373969	5.667	2.60562	0.0431202
2	35	1	61	1	0	0	1	1	0	0	0.131948	0.0176475	7	2.90656	0.0321378
2	23	1	58	1	1	0	1	1	1	1	0.195222	0.0143612	1.593	3.26137	0.0251807
3	22	1	59	1	1	0	1	1	1	0	0.256875	0.00509728	1.083	2.91255	0.0188105
2	30	0	61	0	0	0	1	1	1	1	0.270222	0.035873	4.398	4.90615	0.0380021
2	35	0	41	0	1	0	1	0	0	0	0.344253	0.0422184	1.489	2.83263	0.0909197
2	30	0	65	0	0	0	1	1	1	0	0.15385	0.025086	15.761	3.61696	0.0361097
3	62	0	80	1	1	0	1	1	0	0	0.157743	0.0308535	5	1.85173	0.0396471
2	54	0	76	1	0	1	1	1	1	0	0.174581	0.00639663	7.25	2.17019	0.0474411
2	14	0	65	1	0	0	1	0	0	1	0.182282	0.179827	1.035	3.20675	0.045093
3	36	1	72	1	1	0	1	1	0	0	0.298002	0.022211	1.632	4.2038	0.219091
2	50	0	86	1	0	0	0	0	0	1	0.34888	0.0863101	1.039	3.76046	0.0687445
3	35	1	70	1	0	1	1	0	1	0	0.172709	0.0508497	2.396	2.53946	0.0408566
2	29	0	48	1	0	0	1	1	1	1	0.26698	-0.00378502	1.954	3.29284	0.0453629
2	40	1	66	1	0	1	1	1	0	0	0.157353	-0.00167137	2.287	2.27471	0.0220028
2	34	0	46	0	0	0	1	1	0	0	0.13472	0.0468937	7.173	2.6409	0.0346744
3	24	0	36	0	0	0	1	1	1	0	0.153705	0.00468309	10.5	1.84857	0.0339683
2	22	0	18	1	0	0	1	1	1	0	0.205011	0.0094698	1.833	3.74343	0.0314869
2	40	1	58	1	0	0	1	1	0	0	0.115902	-0.013672	2.929	3.38924	0.0254498
2	39	1	71	0	0	0	1	1	1	0	0.160104	0.0179368	4.727	2.90635	0.0324916
2	25	0	57	1	1	0	1	0	1	1	0.132833	0.0327166	2.248	6.25606	0.0169041
2	40	0	81	0	1	1	1	0	1	1	0.283989	0.0454862	0.56	3.91232	0.0811321
3	20	0	73	0	0	0	1	1	1	1	0.162755	0.0331593	0.155	4.38541	0.0342874
3	22	0	50	1	0	0	1	0	0	1	0.22547	-0.0171665	8.669	3.11473	0.0328
3	20	0	73	0	0	0	1	1	1	0	0.278491	0.0297621	1.906	3.05402	0.0251572
2	40	1	64	0	1	0	1	1	0	0	0.27161	0.0106744	1.725	3.68013	0.0573718
2	32	1	72	1	1	0	1	0	0	1	0.233935	0.0406132	1.997	3.15138	0.0135484
2	25	0	59	1	1	0	1	1	1	0	0.205654	0.0151417	1.78	2.82326	0.050125
2	25	1	59	1	1	0	1	1	1	0	0.333213	0.00564233	1.5	2.74676	0.0732922
2	42	0	76	1	0	0	1	0	1	1	0.422651	-0.105349	0.287	1.9603	0.103723
2	39	0	65	0	0	0	1	1	1	0	0.313088	0.0733285	1.287	3.47707	0.0160185
3	20	0	40	1	0	0	1	0	0	1	0.315414	0.0267287	0.52	3.97056	0.0771154
3	30	0	76	0	0	0	1	0	0	1	0.178307	0.0436112	0.374	3.63495	0.0203125
2	45	0	76	0	0	0	1	0	1	0	0.185313	0.0246038	34.5	2.80287	0.0410714
2	60	0	88	0	0	0	1	0	1	0	0.163363	0.0449719	1.61	2.20766	0.0442901
2	23	1	49	1	0	0	0	0	1	1	0.204421	0.0300147	1.273	4.08114	0.0146167
2	70	0	73	0	1	0	1	1	0	0	0.214205	0.0550105	3.25	3.08711	0.0515152
2	20	0	75	1	0	0	1	0	0	0	0.235288	0.0790497	5.25	2.85846	0.0242066
2	22	0	69	0	0	0	0	1	1	0	0.118168	-0.0104082	0.671	7.68336	0.0399417
2	28	1	83	0	0	0	1	0	0	0	0.191328	0.0316919	2	3.20099	0.0562789
3	70	0	79	0	1	0	1	1	0	0	0.226984	0.0292411	8	5.26036	0.0163872
2	42	1	48	0	0	0	1	1	0	0	0.0181029	0.00903164	5.5	2.32039	0.06795
3	36	1	78	1	0	0	0	1	0	1	0.318869	0.15691	0.627	1.00837	0.115951
2	24	1	63	1	1	0	1	1	1	0	0.186628	-0.00384988	1.604	2.38516	0.0164352
2	21	1	58	0	0	1	1	1	1	0	0.299541	0.07031	1.497	3.69777	0.0411842
2	39	1	69	1	0	0	1	1	0	0	0.10258	-0.00980248	8.682	1.84694	0.0247748
3	40	1	76	1	0	0	1	1	0	0	0.134589	0.0119779	12.678	3.50181	0.0381098
2	30	1	45	1	0	0	1	1	0	0	0.172502	0.014997	2.438	4.84051	0.0418415
2	37	0	77	1	1	0	0	0	0	0	0.267712	0.0433585	1.623	2.41875	0.0219105
2	70	0	59	0	0	1	0	0	0	0	0.372456	0.129791	1.125	5.10905	0.0368909
3	50	0	83	0	0	0	1	0	0	0	0.0178162	0.141304	1.354	3.52079	0.159028
2	58	1	57	1	0	0	1	1	0	0	0.17295	0.0204102	7.025	2.96148	0.0391572
2	50	1	58	1	1	0	1	1	1	0	0.129107	0.0154525	4.729	4.27	0.0352292
3	65	0	83	0	1	0	1	0	0	0	0.226646	0.0358414	1.082	1.8571	0.0492749
3	70	0	89	1	0	0	1	0	1	1	0.138217	0.0189977	1.004	5.06988	0.0338466
2	25	0	62	0	0	0	1	1	1	0	0.209603	0.040904	1.5	4.11797	0.0352214
3	30	1	71	1	1	0	1	0	0	0	0.268546	0.0551323	1.167	3.82368	0.0384615
2	40	0	53	1	0	0	1	1	0	0	0.211072	0.0173231	5.771	3.7483	0.0583744
2	15	0	55	1	0	0	1	1	0	0	0.423479	0.0473497	4.75	2.82887	0.0270786
3	39	1	80	1	0	0	1	1	1	0	0.18255	0.020831	1.485	5.21005	0.0367102
2	45	0	75	1	1	0	1	1	1	0	0.196916	0.0301755	1.115	3.19572	0.0610337
3	30	0	78	0	0	0	1	0	1	1	0.22118	0.026224	2.235	4.93442	0.0332846
2	40	1	69	1	1	0	1	0	0	1	0.266983	0.0296203	0.767	4.56401	0.0530142
3	40	1	78	0	1	0	1	1	0	0	0.203629	0.0420012	1.503	2.35724	0.0467657
2	15	0	63	1	0	0	1	0	1	0	0.18799	0.0232188	1.132	2.47369	0.0251518
2	30	1	55	1	0	0	1	1	0	0	0.151134	-0.0747753	1.5	2.85499	0.0464319
2	28	0	48	1	0	0	1	1	1	0	0.12834	0.0169359	8.227	2.71992	0.0271782
2	70	0	75	1	1	0	1	0	1	0	0.160746	0.00573948	1.833	2.78195	0.0320985
2	70	0	65	1	1	0	1	0	1	0	0.156244	0.0193386	17.5	2.48539	0.00842441
2	50	1	50	0	0	0	1	1	0	0	0.245575	0.050195	21.55	2.26729	0.0433902
2	20	0	68	1	0	0	1	0	1	0	0.267937	0.0284481	1.307	3.7028	0.159188
2	40	1	61	1	1	0	1	0	1	0	0.0781444	0.0226209	5.75	9.78904	0.0415022
2	20	0	44	1	0	0	1	1	1	0	0.125013	0.0349799	3.75	3.53798	0.0252547
3	40	1	64	1	1	0	1	0	0	1	0.243936	0.0187822	0.12	2.33072	0.0142663
2	35	1	57	0	0	0	1	1	0	0	0.135175	0.0239599	2.266	1.89218	0.0506904
3	30	1	64	1	1	0	0	1	1	0	0.284602	-0.00661229	0.438	3.73728	0.0297872
2	70	0	76	1	0	0	0	0	1	0	0.228766	0.0630228	16.25	2.92115	0.0339815
2	70	0	73	1	1	0	1	0	0	0	0.21133	0.0257635	1.013	3.07736	0.0151939
3	25	1	77	0	1	0	1	0	0	1	0.25639	0.0125625	2.11	3.23508	0.0363568
3	20	0	79	0	1	1	1	0	1	0	0.280276	0.0249114	2.639	5.6582	0.0569407
2	40	0	43	1	0	0	1	0	1	1	0.13175	0.00387996	2.625	1.61142	0.0124892
2	70	0	84	0	0	0	1	1	1	0	0.179027	0.0621139	3.347	3.06687	0.0493
2	25	0	78	1	0	0	1	0	1	0	0.282447	0.0291184	0.66	4.5772	0.0802419
2	20	1	67	1	0	0	1	1	1	0	0.305483	0.0104129	0.463	5.06776	0.0736227
3	40	1	76	0	1	0	1	0	0	0	0.259456	0.0725741	0.542	2.93668	0.06139
2	50	0	74	0	1	1	1	0	1	0	0.099664	0.0135676	19.167	4.48057	0.062766
2	25	1	54	1	0	0	1	1	1	1	0.189072	-0.0132806	2.128	2.95683	0.045546
2	55	0	53	1	0	0	1	1	0	0	0.176629	0.0564232	5.667	3.35295	0.0479365
2	37	0	76	1	0	0	1	0	1	1	0.0784637	0.0226311	3.241	2.06191	0.0191663
2	45	0	54	1	1	0	1	1	0	0	0.201492	0.0310234	1.108	2.77745	0.034556
2	43	1	36	1	0	0	0	0	0	0	0.369872	-0.0104061	10.347	2.40316	0.0463415
2	34	1	72	1	1	0	1	0	1	0	0.178779	0.0152735	1.315	4.21181	0.0184848
2	37	1	43	0	0	0	1	1	0	0	0.134093	0.0208374	32	1.98812	0.0534188
2	44	0	48	1	0	0	1	1	0	0	0.144994	0.0158123	8.466	2.00945	0.0264773
2	37	1	58	1	0	0	0	1	0	0	0.166508	0.0516472	4.369	2.17026	0.0562618
3	38	1	73	1	1	0	1	0	1	0	0.125905	0.0679041	3	3.10043	0.0393085
2	40	0	59	0	0	0	1	1	0	1	0.145137	-0.00856489	4.594	7.65585	0.056799
2	23	0	49	1	0	0	1	1	1	0	0.135316	0.023883	3.328	4.37486	0.021996
2	35	1	41	1	1	0	1	1	0	0	0.307831	0.112855	0.779	3.90599	0.0588542
3	48	1	59	1	1	0	1	1	0	0	0.13555	-0.00949363	4	3.55602	0.0339113
3	70	0	55	1	0	0	1	1	0	0	0.276856	0.0152573	2	2.90593	0.0552041
2	30	0	69	1	0	0	1	0	0	1	0.242623	-0.0186495	0.955	41.4458	0.0488095
2	19	0	40	1	0	0	1	0	1	0	0.499849	0.139871	0.035	6.41526	0.0794082
2	50	0	83	1	0	0	1	0	0	1	-0.389146	0.174991	0.76	3.79693	0.0697619
2	70	0	83	0	1	0	1	1	1	0	0.331156	0.0472055	1.533	1.58174	0.0517241
3	28	1	42	0	1	0	1	0	1	1	0.241952	0.0401743	1.2	2.12364	0.0533482
2	30	0	76	0	1	0	1	1	1	0	0.240297	0.0365876	1.082	2.98428	0.0338753
2	35	1	77	1	0	0	1	0	1	0	0.160742	0.0358585	3.177	3.54087	0.0403496
2	60	0	80	0	1	0	1	0	0	1	0.33646	0.0756789	2.567	5.02123	0.0237714
2	70	0	68	0	1	1	1	0	1	0	0.146057	0.0356577	11	3.75896	0.0372984
2	30	0	37	1	0	0	1	1	0	0	0.240315	0.0249379	2.245	3.16257	0.0789533
2	30	1	75	1	0	0	1	1	0	0	0.158439	0.0327121	7.719	2.00051	0.0397727
3	67	0	82	0	0	1	1	0	1	0	0.279909	0.0639305	0.929	2.85285	0.0601904
3	40	1	72	1	0	0	1	0	0	1	0.10471	-0.061269	0.918	3.24069	0.0139189
2	27	1	79	1	1	0	1	1	0	1	0.170873	0.0265338	1.527	2.38361	0.0328659
2	66	0	70	0	1	0	1	1	1	0	0.185918	0.0237698	1.25	2.69206	0.074968
2	60	0	50	1	1	0	1	1	0	0	0.128726	0.00536884	9.1	3.64983	0.031153
2	40	1	58	1	1	0	1	1	0	0	0.152252	0.0233055	4.891	3.99587	0.0875539
3	70	0	80	0	0	0	1	1	1	0	0.107477	0.0455129	7.722	3.09053	0.0272777
3	25	1	69	0	1	0	1	0	0	1	0.226036	0.0306341	0.697	3.57185	0.0322245
2	70	0	70	0	0	1	0	0	0	0	0.290771	0.0154695	1.087	5.74893	0.103143
3	70	0	80	0	1	0	1	1	0	0	0.158483	0.035251	4.75	10.5067	0.0565891
3	30	1	73	0	1	0	1	1	0	0	0.190197	0.0452618	2.109	6.26044	0.0565079
3	25	0	74	0	0	0	1	0	0	0	0.207164	0.0049064	3.5	4.07504	0.0201334
3	30	0	64	1	0	0	1	1	0	0	0.215121	0.0533697	2.52	3.98542	0.0118182
2	25	0	70	1	0	0	1	1	1	1	0.167084	0.0318118	0.81	11.6423	0.038338
3	21	1	37	1	1	0	1	1	0	1	0.691125	-0.108922	0.551	1.46153	0.116039
2	25	0	69	0	0	0	1	0	0	0	0.152705	0.0308277	2.042	2.54239	0.0482987
3	25	1	73	1	1	0	1	1	1	0	0.163829	0.00643818	1.54	2.57762	0.0189503
3	37	0	86	1	0	0	1	0	0	0	0.0672482	-0.0351923	1.35	4.44329	0.0129464
2	35	1	58	1	0	0	1	1	0	0	0.197028	0.0163614	0.222	2.21753	0.0250271
3	48	1	67	1	1	0	1	1	1	0	0.148318	0.0110801	0.917	3.13683	0.0385846
2	42	1	71	1	0	0	1	1	0	0	0.13826	0.020477	1.876	1.21531	0.025
2	51	1	55	1	0	0	1	1	0	0	0.189243	0.0158557	7.397	1.30087	0.0110502
2	50	1	51	1	1	0	1	1	0	0	0.144814	0.0212409	4.576	3.40488	0.0156355
2	20	0	77	0	1	0	1	1	1	0	0.26854	0.021137	1.918	2.16337	0.0188596
2	60	1	58	1	0	0	0	1	1	0	0.137008	0.00313442	10.286	2.46422	0.0264877
2	45	1	64	1	0	0	1	1	0	0	0.224676	0.0403813	9.041	2.08907	0.0270475
2	51	1	69	1	1	0	1	1	1	0	0.171249	0.0113307	4.25	2.43051	0.0390071
2	50	1	56	1	0	0	0	1	0	0	0.225232	0.0582584	12	1.91198	0.0559627
2	39	0	71	1	0	0	1	1	0	0	0.183697	0.0342945	5.234	2.08446	0.0470588
2	39	1	55	1	1	0	1	1	0	0	0.147183	0.0118579	2.6	2.47506	0.0501075
2	30	0	52	1	1	0	1	0	0	0	0.414532	0.0240469	0.083	2.81756	0.0514778
2	33	1	76	1	1	0	1	1	1	1	0.0672611	0.0142665	1.008	2.44592	0.031724
2	36	1	69	1	0	0	1	1	0	0	0.0897074	0.0453892	2.619	2.5518	0.0484375
2	50	1	53	1	1	0	0	0	1	0	0.316874	-0.0709731	0.804	3.71477	0.0542647
3	34	0	67	1	0	0	1	0	1	0	0.28865	0.0427888	5.4	2.29024	0.0356765
2	35	1	64	1	0	0	0	1	0	0	0.202671	0.00884315	4.3	2.76607	0.0395349
2	24	1	61	0	1	0	1	0	0	0	0.139658	0.0150271	1.013	2.28255	0.053953
2	24	1	82	1	0	0	1	1	0	0	0.0950494	0.0513807	21.286	6.92036	0.053675
2	37	1	52	0	0	0	1	1	1	0	0.217266	0.0173856	4.82	3.81793	0.0641572
3	35	1	63	1	1	0	1	1	1	0	0.169748	0.0298716	0.178	2.25413	0.0750647
2	32	1	52	1	0	0	1	1	1	1	0.127596	0.0102453	1.673	3.21415	0.023401
2	25	0	44	1	0	0	1	1	1	1	0.264997	0.0581938	6.377	4.35654	0.0370544
2	22	0	69	0	1	0	1	0	1	0	0.205378	-0.00490548	1	2.76055	0.0290526
2	67	0	55	1	0	0	1	1	0	0	0.184809	0.082067	3.9	3.5863	0.0189951
2	39	0	75	1	0	0	1	0	1	1	0.1931	0.00428071	0.239	4.01448	0.0380139
2	33	1	77	1	1	0	1	0	0	0	0.295323	0.0151646	1.323	5.98486	0.0132827
2	30	0	61	0	0	0	1	0	1	0	0.14536	0.0283248	6	6.01317	0.0357264
2	50	1	66	1	1	0	1	1	0	1	0.193699	0.0266978	1.16	3.95056	0.0374804
2	40	1	63	1	1	1	1	0	0	0	0.246085	0.0532481	1.875	2.56502	0.042402
3	35	0	56	1	0	0	1	1	0	0	0.263668	0.0225382	1.572	2.90696	0.0488506
2	37	1	73	1	0	0	1	0	0	0	0.105708	-0.0114372	4.769	4.30497	0.0653736
2	40	1	65	1	1	0	1	1	0	0	0.198461	0.0458049	5.167	2.72185	0.0277123
3	26	1	71	1	0	0	1	0	1	0	0.160967	0.0208919	1.667	2.60404	0.0432616
3	32	0	76	0	0	0	1	1	1	0	0.250311	0.0284294	4.815	3.64585	0.0330403
2	30	1	68	1	1	0	1	1	1	0	0.59978	0.172132	1.56	2.77137	0.0603778
2	35	1	54	1	0	0	0	1	1	1	0.204001	0.010005	7.198	2.0945	0.0243722
2	28	1	48	1	0	0	1	1	1	0	0.177063	0.0887652	14.833	3.4163	0.0187831
3	20	1	76	1	1	0	1	0	0	0	0.280044	0.22808	0.778	1.68663	0.145517
2	39	1	73	1	1	0	0	1	0	1	0.10958	0.0133745	2.611	3.00564	0.0389692
2	25	0	64	0	1	0	1	1	1	0	0.279321	-0.014811	1.696	2.96929	0.0369265
2	20	1	72	1	1	0	1	0	0	0	0.287878	0.0653729	0.964	2.15757	0.038447
2	37	1	59	1	1	0	1	1	1	0	0.166668	0.0307954	8.1	3.37631	0.0235953
3	30	0	62	1	0	0	1	0	0	0	0.281348	0.00574546	0.285	4.76831	0.0141577
3	26	0	61	0	0	0	1	1	1	0	0.227754	0.0145703	1.508	2.40967	0.0304017
2	70	1	60	1	1	0	1	1	0	0	0.115878	0.0182546	4.944	1.98273	0.0382592
2	29	0	41	1	0	0	1	1	0	1	0.178478	0.0553526	9.024	3.11624	0.0453181
2	43	0	74	1	0	1	1	1	1	0	0.243692	0.0472047	1.145	2.88411	0.0415782
2	59	1	59	1	0	0	1	1	0	0	0.296281	0.0201824	2.33	2.44798	0.0637485
2	29	0	45	1	0	0	1	1	0	0	0.282524	0.030327	6.442	1.87265	0.133382
2	67	0	49	1	0	0	1	0	0	0	0.154315	0.0152344	4.177	2.04366	0.0217656
2	40	1	71	1	0	0	1	1	0	0	0.0778308	0.061162	6.85	2.68758	0.0468298
2	40	1	70	1	1	0	1	1	0	0	-0.0897438	-0.0159447	3.109	4.97834	0.10466
2		0	82	1	0	0	1	0	0	0	0.230726	0.079293	1.701	4.31181	0.0621601
2	45	0	52	0	0	1	1	1	0	0	0.480696	0.113702	0.536	2.65175	0.0565476
2	65	0	58	0	1	0	1	0	0	0	0.276128	0.0403423	1.563	2.84737	0.0489107
2	30	0	51	1	0	0	1	1	0	0	0.147036	0.0108814	5.343	3.01876	0.0485164
2	27	1	72	1	0	0	1	1	0	1	0.199963	0.00209961	0.949	2.20624	0.0340676
2	20	1	56	1	0	0	1	1	0	0	0.216899	0.0280554	5.444	3.37173	0.0422149
2	43	0	54	1	0	0	1	1	0	1	0.142792	0.0187238	4.364	3.95047	0.0393867
2	36	0	50	1	0	0	1	1	0	0	0.228564	0.0309511	0.948	2.18854	0.0318103
2	20	1	68	1	0	0	0	1	1	0	0.224747	0.0143821	1.478	4.95089	0.0330357
2	23	0	37	0	0	0	1	1	0	1	0.248019	0.0517677	0.528	4.65125	0.0684732
2	22	0	55	1	0	1	1	1	0	0	0.251486	0.0166721	7.89	2.25265	0.0403034
2	52	1	52	0	1	0	1	1	0	0	0.214396	0.0106681	7	2.63282	0.0367433
2	40	1	83	1	0	0	1	0	0	1	0.158419	0.0180384	0.544	5.13917	0.0342518
2	40	1	41	1	0	0	1	1	0	0	0.156685	0.0232046	12.653	3.20284	0.0449843
2	45	0	72	1	0	0	1	1	0	0	0.103565	0.01283	12.5	2.57144	0.0420228
2	59	0	28	1	0	0	1	1	0	0	0.272637	-0.00937691	15	1.4892	0.0690045
2	30	0	46	1	0	1	1	1	0	0	0.203719	0.0372269	6.636	1.39204	0.0364538
2	38	0	45	1	0	0	1	1	1	0	0.264004	0.0342335	10.938	2.46132	0.0779853
2	38	1	67	1	0	0	1	1	0	1	0.212042	0.0419229	5.016	3.35816	0.0402047
2	45	1	78	1	1	0	1	0	0	0	0.198458	0.0281723	21.75	3.57409	0.0350877
2	38	0	82	0	0	0	0	0	0	1	0.211356	0.0337839	1.245	4.46744	0.0365741
2	34	1	58	1	1	0	1	1	1	0	0.172878	0.0711914	4.852	2.85015	0.0384948
2	20	0	62	1	0	0	1	1	0	0	0.149695	0.023078	5.5	2.09712	0.0264423
2	10	0	72	1	0	0	1	1	1	1	0.165667	0.0151637	1.115	5.99296	0.0244411
2	40	1	60	1	1	0	1	1	1	0	0.152622	0.0100465	5.755	2.90781	0.0305219
2	30	1	73	1	0	0	1	1	0	0	0.262645	0.0248048	3.286	2.82276	0.0164141
2	17	1	62	1	0	0	1	1	1	0	0.333232	0.0114071	3.403	4.7968	0.0756501
2	25	1	53	1	0	0	1	1	1	0	0.208041	0.0286924	21.643	2.28084	0.0321863
2	25	0	65	1	0	0	1	1	0	0	0.255388	0.0713328	7.132	4.02774	0.0644654
2	26	1	63	1	1	0	1	1	0	1	0.220632	0.0691722	1.843	2.87182	0.0418028
2	34	1	73	1	0	0	1	1	1	1	0.370698	0.116299	6.165	2.41462	0.0545455
2	52	0	63	1	0	0	1	1	0	0	0.351624	0.0217029	1.882	2.89203	0.0527903
2	13	0	71	0	0	0	1	1	1	1	0.320284	0.0305704	0.315	2.96108	0.0377881
2	35	0	64	0	0	0	1	1	1	0	0.0890584	0.0306463	9	3.04994	0.0372299
2	40	1	77	1	0	0	1	1	0	1	0.161755	0.0293763	2.239	2.52307	0.14387
2	30	1	70	0	1	0	1	1	0	0	0.171726	0.0492329	2.734	1.99331	0.0673463
2	20	0	57	0	0	0	1	1	1	1	0.0361821	0.0224552	3.25	1.42324	0.030059
3	18	0	51	1	1	0	1	1	1	1	0.215918	0.0404311	1.692	5.62736	0.0348837
2	35	1	52	1	1	1	1	0	0	0	0.228787	-0.0233211	0.904	2.01123	0.0532653
2	42	0	38	1	0	0	1	0	0	0	0.222792	0.00793201	11	2.69908	0.04
3	35	0	48	0	0	0	1	1	1	1	0.131657	-0.0157622	1.929	3.32981	0.0513771
2	31	0	20	0	0	0	1	1	0	0	0.239451	0.0300276	9.389	5.77803	0.0307692
2	38	0	65	1	1	0	1	1	0	0	0.151366	0.040641	1.333	2.369	0.0484802
2	40	0	73	1	0	0	1	0	0	1	0.190338	0.0477987	3.181	1.9961	0.0608974
2	47	0	67	0	0	0	1	1	1	0	0.20405	0.0184717	3.75	3.22324	0.0211831
2	30	0	52	1	0	0	1	1	0	0	0.176796	0.025931	5.578	4.14024	0.0265934
2	30	0	69	1	1	0	1	1	1	1	0.151166	0.0290917	3.22	2.87475	0.0241071
2	35	1	69	1	1	0	0	1	0	0	0.434881	0.0849695	0.563	2.1014	0.0934598
2	30	0	71	1	0	1	1	0	0	1	0.149522	0.0483428	2.341	2.48981	0.0647321
2	35	1	73	1	0	0	1	0	0	0	0.294262	0.0441539	0.385	2.14173	0.0450244
2	40	1	83	0	0	1	1	0	1	0	0.221254	0.0762643	0.907	2.69818	0.0434892
2	19	0	49	1	0	0	1	1	1	0	-0.809469	0.18658	0.612	2.3763	0.0285088
2	38	0	64	1	0	1	1	1	1	0	0.147169	0.0230152	1.74	4.0337	0.0361458
2	40	0	80	1	1	0	1	1	1	1	0.209144	0.0615818	4.568	4.96891	0.0306397
2	30	0	72	1	0	1	1	0	1	1	0.137346	0.0122118	3.168	2.9358	0.0261868
2	27	0	78	0	0	0	0	1	1	0	0.175285	0.0559527	0.722	3.69679	0.0577659
3	15	1	60	1	0	0	1	1	1	1	0.177083	0.0149437	6.708	3.58971	0.0297153
2	35	0	74	0	0	0	0	1	1	0	0.129151	-0.0278455	3.765	1.87985	0.0397857
2	25	1	31	0	0	0	0	1	0	1	0.205778	0.0195648	5.987	3.19695	0.0766807
2	15	1	52	1	0	0	1	1	1	1	0.11984	-0.0229566	1.738	6.60726	0.0303079
2	32	1	74	1	0	0	1	1	1	0	0.258656	0.0580448	0.833	2.85898	0.0273896
2	31	1	40	1	1	0	1	0	0	0	0.152605	-0.00888195	20.667	2.41688	0.0158713
2	42	1	71	1	0	0	0	1	0	1	0.2391	0.0415376	4.818	1.89944	0.0400203
2	55	0	47	1	0	0	1	1	1	0	0.0304407	0.0949007	5.781	2.48544	0.0616999
2	38	0	56	0	1	0	1	1	1	0	0.259877	0.0376314	2.029	1.65094	0.016835
2	25	1	82	1	1	0	1	0	0	1	0.204703	0.0582526	2.706	1.68659	0.0519058
2	17	0	57	1	0	0	1	1	1	0	0.213728	0.0185171	3.002	2.58822	0.0224599
2	17	0	47	1	0	0	1	1	0	0	0.331106	0.0472525	1.533	1.58174	0.0517241
3	50	1	79	0	1	0	0	1	1	1	0.161179	-0.0268136	2.63	2.99978	0.0636111
2	40	1	65	1	1	0	1	1	0	0	0.161948	0.0222076	1.436	3.06751	0.0482732
2	37	1	59	0	1	0	1	1	0	0	0.152516	0.0413075	6.833	3.19412	0.072018
2	24	0	69	1	1	0	1	1	1	0	0.130815	0.0179083	2.75	2.81834	0.0283242
2	36	0	56	1	0	0	1	0	0	0	0.222408	0.0426645	8.25	1.95518	0.0246139
3	26	0	52	1	0	1	1	1	0	0	0.230458	0.0560349	6.162	3.83086	0.0322214
2	39	1	66	1	1	0	0	0	0	1	0.234409	0.0251317	0.788	5.19509	0.0453357
2	35	1	72	1	1	1	1	0	0	0	0.29465	0.0940435	0.866	1.65985	0.0296143
2	36	1	66	1	0	0	0	1	1	1	0.263898	0.0212797	0.355	4.17354	0.0433333
2	35	1	69	1	1	0	1	1	1	0	0.214933	0.0283739	5.5	2.28235	0.0526114
2	34	1	58	1	0	0	1	1	0	0	0.135128	0.0235767	8.872	3.03396	0.0299609
2	39	0	55	1	1	0	1	0	0	0	0.178925	-0.00519186	0.25	3.71782	0.0667989
2	24	0	74	0	1	1	1	1	1	0	0.294147	0.128366	1.232	3.49066	0.0473312
2	45	1	53	1	0	0	1	1	0	0	0.084858	0.0199376	3.788	2.0437	0.0414894
3	38	1	50	1	0	0	1	1	0	1	0.231289	0.0583279	5.471	4.37907	0.0681045
3	45	1	73	1	1	0	1	1	0	0	0.146113	0.0382922	2.267	3.42409	0.0394392
2	38	1	68	1	0	0	0	1	0	1	0.157219	0.00299246	3.367	3.36661	0.035755
2	35	1	61	1	1	0	1	1	0	0	0.310116	0.0699785	5.39	3.10473	0.053477
2	60	1	64	1	1	0	1	1	0	0	0.250899	0.0581778	12.167	2.9998	0.0330477
2	35	1	37	1	0	0	1	1	0	1	0.225074	0.039039	11.567	4.65901	0.0406428
2	40	1	61	1	1	0	1	1	0	0	0.163146	0.0367417	2.539	3.61632	0.0408095
2	40	0	62	1	0	0	1	0	1	1	0.168589	0.0203449	6.514	2.79628	0.0317912
2	39	1	63	0	0	0	1	1	0	1	0.263438	0.0258667	4.695	2.36823	0.0463963
2	27	1	71	1	1	0	1	1	1	0	0.191907	0.0160033	2.166	3.15812	0.0292208
2	30	0	83	1	1	1	1	0	0	0	0.195845	0.046083	0.564	3.33404	0.0261494
2	50	0	30	0	0	0	1	1	0	0	0.14588	0.0329446	8.786	3.59115	0.0386513
3	38	1	75	1	1	0	1	1	0	1	-0.588987	0.0169683	4.375	2.04445	0.0234432
3	25	1	55	1	1	0	1	1	1	0	-0.0654799	0.0607887	0.438	2.52022	0.0746528
2	57	0	60	1	0	0	1	1	0	0	0.257078	0.0348233	2.028	2.75996	0.0343482
2	66	0	50	0	0	0	0	1	0	0	0.190752	0.0447457	26	3.70787	0.0345278
2	35	1	70	0	1	0	1	1	0	0	0.379936	0.107306	1.605	3.50279	0.0573696
2	25	1	80	1	0	0	1	1	1	1	0.278255	0.00714276	0.619	3.60516	0.0167742
2	35	1	85	0	0	0	1	1	1	0	0.285102	0.0482668	0.813	3.8904	0.0215517
2	30	0	72	0	0	0	1	1	0	0	0.123324	0.00137055	3.382	3.0992	0.0482155
2	39	0	60	0	0	0	1	1	1	0	0.238644	0.0728779	7.783	3.76894	0.0509259
2	41	0	38	0	0	0	1	1	0	0	0.281975	0.0381736	23.667	2.47579	0.0391705
2	45	1	69	1	0	0	1	1	0	0	0.15986	0.00842083	4.3	2.369	0.0357143
2	62	0	65	1	0	0	0	1	0	0	0.109169	-0.0148499	6.044	2.3951	0.0240625
3	61	0	83	0	0	0	1	0	0	0	0.110691	0.00895968	17.833	3.61569	0.0162879
2	53	0	36	1	1	0	1	1	0	0	0.141114	0.00137362	3.75	2.6746	0.0178511
2	22	1	46	1	0	0	1	1	1	1	0.167912	-0.0426388	11.653	2.25106	0.0299564
2	70	0	76	1	1	0	1	0	0	1	0.17354	0.0450769	5.088	1.4972	0.0139394
2	24	1	63	0	0	0	1	1	0	0	0.140704	0.0145374	1.449	2.40769	0.121522
2	31	1	37	1	0	0	1	1	0	0	0.168028	0.0186334	6	2.51949	0.0152439
2	43	0	44	1	0	0	1	0	0	0	0.248385	0.054247	13.5	2.95439	0.0554311
2	29	0	73	0	1	0	1	1	1	0	0.136957	-0.00432458	3	3.794	0.0532297
2	30	1	45	0	0	0	1	1	0	0	0.169113	0.0158078	3.5	2.90146	0.0343319
2	30	1	61	1	1	0	0	1	0	0	0.201861	0.0201238	0.18	2.75604	0.0484914
2	30	0	58	1	0	0	1	1	1	0	0.115706	0.0266681	8.929	2.19796	0.0203571
2	12	0	71	1	1	0	1	0	0	0	0.176332	0.0186399	1.519	3.2286	0.0176082
2	34	1	67	1	0	0	1	1	0	0	0.182533	0.0169382	6.218	8.00641	0.0415375
2	32	1	64	0	0	1	1	0	0	0	0.156419	0.0385446	3.436	2.77489	0.053603
2	35	0	69	1	1	0	1	0	0	0	0.180067	0.0315854	2.125	3.56191	0.0506452
2	52	0	50	1	0	0	1	1	0	0	0.149598	0.00939082	0.7	4.16544	0.0307882
2	57	1	58	0	0	0	1	1	0	0	0.282499	0.0227462	13.75	3.09195	0.0500374
3	35	1	74	1	1	0	1	1	0	0	0.23585	0.0324371	6.8	2.29334	0.0414336
2	30	0	75	0	1	0	1	1	1	0	0.152237	0.0455474	1.953	2.34864	0.0490669
3	25	1	57	1	0	0	1	0	0	0	0.365579	0.0199746	1.4	2.16577	0.0589313
3	40	1	65	1	0	0	1	1	0	1	0.248204	0.0142373	1.535	3.87793	0.0506803
2	30	1	70	1	0	1	1	0	1	0	0.237492	0.0597596	2	3.56909	0.0304072
2	70	0	67	0	1	0	0	1	1	1	0.198174	0.0416361	6.644	3.13853	0.0452986
2	62	0	71	0	0	0	1	0	1	0	0.27108	-0.0197237	2.357	3.60427	0.0385802
2	23	1	66	1	0	0	1	1	0	0	0.328673	0.0545057	1.012	2.99783	0.0478395
2	30	0	67	0	1	0	1	1	1	0	0.135938	0.0251053	3.25	4.87702	0.0378205
2	30	0	65	1	0	0	1	1	0	0	0.187616	0.00414074	12.328	2.87944	0.0169872
2	35	1	61	1	1	0	1	1	1	0	0.253926	0.00442559	15.75	3.5704	0.0353741
2	18	1	71	1	0	0	1	0	1	0	0.0706483	-0.0500153	0.811	1.56631	0.029384
2	40	1	50	1	1	0	1	0	0	0	0.321416	0.0594633	2.5	1.32362	0.0387963
2	62	0	62	0	0	0	1	1	0	0	0.21161	-0.0424553	1.167	1.90361	0.0590278
2	39	0	50	1	0	0	1	1	1	0	0.206614	0.0445184	9.057	2.51098	0.0343595
3	16	0	56	1	0	0	1	1	0	1	0.200842	0.01467	0.518	2.75756	0.0611842
2	25	0	60	1	1	0	1	1	1	1	0.169678	-0.00323042	0.986	3.36692	0.0288009
2	28	1	52	0	0	0	1	1	1	0	0.364628	0.0466892	10	2.3544	0.037988
3	48	0	57	0	1	0	1	1	1	0	0.305373	0.0134931	0.085	2.21378	0.0345138
2	37	0	74	1	0	0	1	1	0	1	0.133902	0.0191858	7.035	2.42482	0.0187155
2	54	0	73	1	0	1	1	0	1	1	0.0417305	0.0431593	1.42	2.46845	0.0260847
2	35	1	61	1	1	0	1	1	0	0	0.279335	0.0160696	1.882	1.93962	0.0451177
2	25	0	39	1	1	0	1	1	1	0	0.125899	0.0462571	21	3.46605	0.041634
2	20	1	51	1	0	0	1	1	0	0	0.168471	0.00742301	4.657	3.98823	0.0370557
2	38	1	76	1	1	0	1	1	0	0	0.22955	-0.0173032	1.856	2.74702	0.0952962
3	25	1	70	0	1	0	1	0	0	0	0.218407	0.021804	0.427	2.53266	0.062069
2	25	0	58	1	0	0	1	0	0	0	0.192992	0.0183456	11.425	2.79772	0.0725289
2	50	0	49	1	0	0	1	1	0	0	0.252587	0.08783	7.63	2.58941	0.0388462
2	40	1	55	1	0	0	1	1	0	0	0.111583	0.00783366	12.25	3.43023	0.0337942
2	30	0	69	1	0	0	1	0	0	1	0.193752	-0.00388783	0.557	2.70863	0.0318765
2	64	0	68	1	0	0	1	0	0	0	0.17271	-0.00432383	3.5	4.05145	0.0398831
2	30	1	72	1	1	0	0	1	0	0	0.167656	0.0459771	1.938	8.92526	0.0438179
2	30	1	70	1	1	0	1	0	0	0	0.157165	0.00331195	2.447	2.91282	0.0303826
2	60	0	72	1	0	0	0	1	1	0	0.172839	0.0839739	4.571	3.53272	0.0668333
2	39	1	59	1	1	0	1	1	1	0	0.246071	0.0128588	4.071	4.12523	0.0522321
2	35	1	61	1	0	0	1	0	0	0	0.175642	0.0181893	10.364	2.78759	0.0252924
2	60	0	72	0	1	0	0	1	0	0	0.181143	0.0612257	3.912	3.18801	0.060146
2	45	1	60	1	0	0	1	1	0	0	0.191373	0.0159317	7.417	2.88755	0.0416148
3	25	1	73	1	1	0	1	1	0	1	0.213222	0.0385733	1.387	1.27256	0.0561842
2	35	0	68	0	0	0	1	0	1	1	0.312574	0.0734536	1.931	2.9458	0.0924086
2	25	1	70	0	1	0	1	1	1	1	0.348366	0.0271702	0.591	4.87566	0.0402736
2	24	1	55	1	0	0	1	1	1	1	0.198557	0.0344051	3.014	3.61495	0.0381944
3	20	1	57	1	1	0	1	1	0	0	0.233037	-0.035359	1.643	1.55481	0.0288538
3	19	1	57	1	0	0	1	1	0	1	0.194972	0.00344022	1.038	2.53234	0.0367502
2	39	1	59	1	1	0	1	1	0	0	0.184912	0.0062313	4.818	2.30258	0.0272155
2	50	1	77	1	0	0	1	1	1	0	0.205264	0.010843	1.651	3.04614	0.0552503
2	40	1	66	1	0	0	1	0	1	0	0.211262	-0.0402153	5.5	3.29803	0.0187132
2	50	0	49	1	1	1	1	0	0	0	0.224835	0.0395023	1	2.77264	0.0474918
2	20	0	67	0	1	0	1	1	1	1	0.263159	0.0275352	3.076	4.70138	0.0470353
2	60	1	61	0	1	0	0	1	0	0	0.416328	0.11336	3.287	2.68948	0.0736804
2	50	1	66	1	0	0	1	0	0	0	0.261846	0.0244009	0.53	2.3493	0.0176103
3	22	1	59	1	1	0	1	1	1	0	0.214156	0.035625	3.083	2.48045	0.0352584
2	35	0	50	1	0	0	1	1	0	0	0.282698	0.034204	6	1.98223	0.0153001
2	68	0	67	0	1	0	1	1	0	0	0.247506	0.0354953	5.5	2.87491	0.0399081
3	35	1	47	1	1	0	1	0	0	0	0.350087	0.0824705	0.764	2.32114	0.0938725
2	40	0	75	0	1	0	1	0	1	0	0.20082	0.0370247	3.487	1.9206	0.0741102
2	35	1	70	0	0	0	1	0	1	0	0.318401	0.0318377	3.474	4.62589	0.0567625
2	67	0	79	0	0	0	0	1	1	0	0.145649	-0.0290378	2.196	2.75803	0.0431402
2	35	1	66	1	0	0	1	0	1	0	0.292075	0.0282723	1.306	2.03989	0.0578549
2	50	1	55	1	0	0	1	1	0	0	0.0655682	-0.0274089	6.427	2.63052	0.0316107
3	39	1	67	1	1	0	1	0	1	0	0.296604	0.0306766	0.748	2.66278	0.0464586
2	40	1	60	1	0	0	1	1	1	0	0.168889	0.0345989	10.326	2.28863	0.032364
2	40	1	55	1	0	0	1	1	0	0	0.160677	0.000580494	13.167	2.03241	0.0380411
2	30	0	67	1	0	1	1	1	0	0	0.159519	0.0161541	8.1	3.20473	0.0368089
2	37	0	49	0	0	0	1	1	0	0	0.177921	0.116476	7.784	2.84255	0.0433858
3	25	1	73	0	1	1	1	1	0	0	0.259932	0.0331598	1.9	1.48062	0.0613027
2	62	1	59	1	0	0	0	1	0	0	0.172344	0.0308173	9.417	4.11162	0.0267197
2	70	0	62	0	1	0	1	1	0	0	0.179903	0.0415929	41	3.4209	0.0409297
2	70	0	71	1	1	0	1	0	1	0	0.196533	-0.0220033	1.701	2.90669	0.0319149
2	40	1	77	1	0	0	1	0	1	1	0.157809	0.0493213	1.05	2.48024	0.0295983
3	25	1	70	0	1	0	1	1	1	0	0.268858	0.00905531	1.036	1.41204	0.0323933
2	40	0	48	0	0	0	1	1	0	0	0.199918	0.00356144	3.871	2.46697	0.0258684
2	65	0	69	1	1	0	1	1	0	0	0.115069	-0.0656199	10.167	5.6992	0.0181452
2	60	1	63	1	0	0	0	1	0	0	0.118821	0.0237046	3.15	3.18352	0.0274823
2	30	0	72	1	1	0	1	0	0	0	0.433345	0.0590111	1.119	1.72631	0.0311047
2	45	0	65	0	0	0	1	1	0	0	0.153354	0.0171382	6.777	2.2184	0.0510344
2	40	0	41	1	0	0	1	1	0	0	0.187742	0.0292238	7.5	2.40794	0.0275362
2	32	1	48	1	0	1	1	1	1	0	0.338145	-0.0129612	4.227	2.91997	0.0492599
2	34	1	70	1	1	0	1	1	0	0	0.191824	0.076734	2.059	3.18545	0.0458806
2	25	0	81	1	0	0	1	0	0	1	0.289245	0.0289204	3.394	2.73757	0.0231266
2	30	0	76	1	0	0	1	0	1	0	0.212519	0.00957376	3.17	4.60471	0.0762963
3	38	1	54	0	0	0	1	1	0	0	0.181001	0.0111595	3.5	1.54765	0.0723072
2	30	1	61	1	0	0	1	1	0	0	0.103103	0.0435383	3.667	6.16809	0.0296586
2	43	0	43	1	0	0	1	1	0	0	0.226758	0.0145495	13.167	2.89751	0.0298904
2	40	1	52	1	0	0	1	1	0	0	0.217512	0.0206396	3.395	3.15376	0.0294292
2	40	0	64	1	0	0	1	1	0	1	0.138597	0.0424657	3.132	8.42844	0.0397727
2	35	0	70	1	0	0	1	1	0	0	0.197569	0.0107055	4.277	2.99911	0.027439
2	25	1	75	1	1	0	1	0	1	0	0.236092	0.0258403	0.548	5.05215	0.053489
2	30	0	52	1	0	0	0	1	1	0	0.212244	0.0341715	3.203	2.3084	0.0319559
2	30	0	58	1	0	0	1	1	0	0	0.180456	0.0181526	5.29	2.77651	0.0281722
2	30	0	39	1	0	0	1	1	0	0	0.221819	0.0215713	15.063	3.91146	0.0141154
2	31	0	64	1	0	0	1	0	1	0	0.25112	0.0116804	3.407	3.26015	0.0336779
2	30	0	85	1	0	0	1	0	1	0	0.177974	0.00810535	2.017	5.48234	0.0585106
2	68	1	72	0	0	0	1	0	0	1	0.242301	0.0618259	0.919	2.98508	0.0544872
2	39	1	82	0	1	0	1	1	0	1	0.206421	0.0428561	1.185	2.58287	0.0503472
2	25	0	48	1	0	0	1	1	0	0	0.197452	0.0250257	8.098	2.10125	0.0531015
2	20	1	67	1	0	0	1	1	1	1	0.112127	0.0703753	1.945	4.07658	0.0797009
2	50	1	59	1	0	0	1	0	0	0	0.208301	0.053334	5.35	2.1088	0.0470993
2	55	1	65	1	1	0	1	0	0	0	0.108353	0.00765386	4	2.11381	0.0371414
3	38	1	70	0	0	1	1	1	1	0	0.271733	0.0371772	13.5	2.86797	0.0589748
2	32	1	47	1	0	0	1	1	1	0	0.197351	0.0218655	2.922	2.86089	0.0322205
2	30	1	52	1	1	0	1	1	0	0	0.170743	0.0221926	6.6	2.81419	0.0358527
2	68	1	63	0	0	0	0	1	0	0	0.200536	0.0516905	6.261	3.5293	0.0540523
2	55	0	57	1	1	0	1	1	1	1	0.193903	0.00667068	3.175	5.7746	0.0340596
2	34	1	75	0	1	0	1	1	0	0	0.103477	0.0173821	3.5	3.09248	0.0855079
2	58	0	71	0	0	0	0	1	0	0	0.126896	0.012466	10	1.70051	0.0390909
2	30	0	58	0	0	0	1	1	1	0	0.2376	0.0667326	2.331	2.79229	0.0201351
2	40	1	75	1	1	0	1	1	0	0	0.138824	0.0122291	2.096	2.92702	0.0539952
2	47	1	62	1	1	0	1	1	0	1	0.152498	0.0425775	5.275	1.8283	0.0454193
2	20	0	51	1	0	0	1	1	0	0	0.187266	-0.0110575	1.81	2.78442	0.0154137
3	20	1	73	1	1	0	0	1	1	1	0.195857	0.00857624	0.886	4.26014	0.111182
2	70	0	75	0	0	0	1	1	0	0	0.206441	0.0165913	5.437	3.42664	0.0579866
2	41	0	74	1	0	1	1	0	1	0	0.27162	0.0386597	2.912	6.49807	0.0484893
2	35	1	59	1	0	0	1	1	0	0	0.219878	0.0279409	13.125	2.45211	0.0249625
2	20	0	55	1	0	0	1	1	1	0	0.17152	0.0133566	3.783	6.31828	0.0190453
2	18	0	69	1	0	1	0	1	1	1	0.3135	0.0443258	1.804	5.97223	0.0906613
2	20	0	51	1	0	0	1	1	0	0	0.299373	0.0317389	2	1.91416	0.0635484
2	21	0	60	1	0	0	1	1	1	1	0.273365	0.0132142	1.692	3.10033	0.0257499
2	26	0	75	1	0	1	1	1	1	1	0.072909	-0.0033757	5.602	1.28473	0.0391694
2	35	0	70	1	1	0	1	1	1	0	0.191127	0.0556282	4.9	3.76633	0.0408579
2	33	0	51	0	0	0	1	1	0	1	0.251283	0.0297031	8.806	4.24382	0.0436701
2	35	1	72	1	0	0	1	1	0	1	0.129547	0.00893723	0.888	3.84501	0.0273133
2	25	0	73	1	0	0	1	1	0	1	0.225076	-0.016011	1.54	5.74129	0.0454545
2	20	1	69	1	1	0	1	1	0	0	0.0888311	0.0128989	0.786	1.82529	0.0298485
2	20	0	51	0	0	0	1	1	0	1	0.284309	0.0754594	1.759	2.46306	0.0560738
2	25	0	61	1	0	0	1	1	0	0	0.284733	0.0640189	6.2	2.73736	0.054337
2	33	1	61	1	1	1	0	1	1	1	0.287615	0.0386477	1.841	4.04014	0.0608974
2	28	0	51	0	0	0	1	1	0	1	0.464267	0.262838	2.093	1.87947	0.0541667
2	25	1	77	0	1	1	1	1	1	1	0.224585	0.0209047	1.504	3.4043	0.0302439
2	29	1	59	1	1	1	1	1	1	1	0.149028	0.0126439	1.112	4.58129	0.0914158
2	30	1	72	1	0	0	1	1	1	0	0.229917	0.0349341	0.971	2.10083	0.0542528
2	45	0	64	0	1	0	1	0	0	0	0.202156	0.0178169	3.448	2.48144	0.0341837
3	58	0	45	1	0	0	1	1	0	0	0.139841	0.013116	7	2.27418	0.038515
3	25	0	75	1	1	1	0	0	1	1	0.160115	0.00539837	2.715	5.97473	0.0339277
2	28	0	79	1	0	0	1	1	0	1	0.268211	0.00276753	5.14	3.5927	0.0364583
2	20	1	81	1	0	0	1	0	1	1	0.21617	-0.0137194	2.992	3.34849	0.0431686
2	25	1	53	1	1	0	1	1	0	0	0.466948	0.0474057	0.219	2.08365	0.0528438
3	18	0	58	1	1	0	1	0	1	1	0.580356	0.101551	0.14	2.67896	0.0147516
2	48	1	70	1	1	0	0	1	1	0	0.122073	0.0590178	5.169	4.18203	0.0410723
2	39	1	52	1	0	0	0	1	0	0	0.171988	-0.0242882	3.227	3.16779	0.0249586
3	21	1	52	1	0	0	1	1	1	1	0.272715	0.0472117	0.274	3.41791	0.0500776
2	17	1	48	1	0	0	1	1	1	1	0.200805	0.0165568	0.187	4.50412	0.0544522
2	35	1	71	1	0	0	1	1	1	0	0.170602	0.0446712	1.429	2.49495	0.0411498
2	19	0	44	1	0	0	1	1	1	0	0.257952	0.0244037	8.167	2.58999	0.0456259
2	38	0	72	1	0	0	0	0	1	0	0.0640192	0.0173638	9.805	4.06663	0.0213836
3	30	0	62	0	0	0	1	1	0	0	0.18194	0.0198373	2.786	2.35471	0.0424397
2	25	1	65	1	0	0	1	1	1	0	0.191766	0.0225052	4.071	1.94613	0.0252315
2	28	1	72	0	1	0	1	1	1	0	0.0749547	-0.0368837	6.821	3.35871	0.0376163
2	56	0	38	0	0	0	1	1	0	0	0.193916	0.00231578	3.389	2.85058	0.0326797
2	25	0	66	1	0	1	1	0	1	0	0.285815	0.0469208	0.239	5.9276	0.105535
2	35	0	50	1	0	0	1	1	0	1	0.106279	0.00916853	10.054	2.42958	0.0197492
2	35	0	65	1	0	0	1	1	1	0	0.0622342	0.0416938	7	3.8374	0.0153725
2	27	1	71	1	0	1	1	1	0	1	0.202398	0.0404417	3.929	2.09282	0.0660219
3	15	1	70	1	0	1	1	0	1	0	0.19305	-0.0446241	0.815	3.44067	0.0309817
2	30	0	51	1	1	0	1	1	1	0	0.198186	0.0259378	6.083	3.17171	0.0270686
2	20	1	64	1	1	1	1	1	0	0	0.232986	0.0357131	2.2	3.21213	0.0588421
2	40	0	42	1	1	0	0	1	0	0	0.328351	0.0714829	1.071	2.22073	0.0720211
2	32	0	51	1	1	0	1	1	0	0	0.229781	0.0140005	1.561	3.96096	0.016129
2	48	0	45	1	0	0	1	1	0	0	0.196093	0.0222131	13.313	2.9947	0.0213555
2	26	0	41	1	0	0	1	1	0	1	0.157372	0.0196248	9.884	4.1865	0.0408046
2	50	0	60	0	0	0	1	0	0	0	0.12186	0.0168763	14.5	1.68226	0.0391114
2	24	0	71	1	0	0	1	0	1	1	0.106296	0.0170564	2.156	3.08756	0.02228
2	58	0	66	0	1	0	1	0	0	0	0.220293	0.0617617	7	2.86305	0.0403175
2	35	0	56	1	1	0	1	1	0	0	0.282317	-0.0192276	3.44	1.47536	0.0255602
2	55	0	68	0	1	0	1	0	0	0	0.270809	0.0667816	1.409	2.55902	0.0720033
2	26	1	58	1	0	0	1	0	1	0	0.162177	-0.0108287	0.558	2.03342	0.0266822
2	30	0	53	1	0	0	1	1	1	1	0.233829	0.0767492	11.003	4.41187	0.0226648
2	15	0	75	1	0	0	0	1	1	0	0.24154	0.0609982	1.005	6.43077	0.0678571
3	44	1	68	1	1	1	1	0	1	0	0.210765	0.147981	0.542	2.96124	0.0650309
3	35	1	81	1	1	0	1	0	1	1	0.167841	-0.0182757	1.436	2.38017	0.0321508
2	25	1	54	1	0	0	1	0	0	0	0.214309	0.0342266	12.121	2.95595	0.0533268
3	20	0	57	1	0	0	1	1	0	1	0.127233	0.0130927	1.426	2.33502	0.0392562
2	15	1	66	1	0	0	1	0	1	0	0.408663	0.0845807	0.331	1.35972	0.0528571
2	20	1	73	1	1	0	1	1	1	0	0.155856	0.0429694	2.572	3.2587	0.0324592
2	36	0	58	1	0	0	1	1	0	0	0.116723	0.0495431	6.026	2.37118	0.0388569
3	25	1	63	0	1	0	1	1	0	1	0.289194	-0.00254113	0.017	1.00735	0.0464865
2	30	1	71	1	0	0	1	1	0	0	0.0940017	0.0417789	3.75	3.41345	0.0514706
2	44	1	63	1	0	0	1	1	0	0	0.192046	0.0170978	2.864	1.88702	0.0209375
2	30	0	72	0	1	1	1	0	1	0	0.210803	0.0243897	3.444	5.19465	0.0338168
2	39	0	69	1	1	0	1	1	0	0	0.158279	0.00712307	2.64	2.13203	0.0501502
2	50	1	67	1	1	0	1	1	1	0	0.14364	0.0327633	0.264	1.75423	0.0422449
2	35	1	67	1	1	0	0	1	1	0	0.216408	0.0563874	0.75	2.91777	0.0621476
2	20	1	59	1	1	0	1	1	0	0	0.128798	0.0312119	0.721	1.47737	0.0437143
2	25	1	62	0	0	1	1	1	1	0	0.263633	0.0755714	0.876	2.64891	0.0298195
2	25	1	55	1	0	0	1	0	0	1	0.262469	0.0192756	3.5	6.15534	0.0435811
2	40	1	68	1	1	0	1	1	0	1	0.133688	0.025243	3.94	2.36773	0.0430425
2	49	0	76	0	0	0	1	1	1	0	0.184653	0.0434149	4.939	3.40048	0.0280742
2	70	0	73	0	1	0	1	0	0	0	0.0826301	0.0881187	1.991	1.4835	0.0551123
2	53	0	75	1	0	0	1	0	0	0	0.159615	0.00530709	2.32	11.3006	0.0228893
2	39	0	30	1	0	0	1	1	0	0	0.268936	0.00817226	3.266	2.40537	0.102143
3	35	1	70	0	1	0	1	1	1	0	0.11074	0.0182203	1.407	4.21538	0.0374644
3	39	0	53	1	0	0	1	1	1	0	0.137859	0.00612383	2.371	3.08991	0.0313632
2	22	0	57	1	0	0	1	1	1	1	0.206679	0.0209104	1.613	2.76085	0.0346882
3	18	0	42	1	1	0	1	1	0	0	0.160395	0.0404404	5.718	2.56787	0.0543367
2	70	0	70	0	1	0	0	0	1	0	0.256387	0.0378624	13.5	3.5468	0.0224692
2	40	1	57	1	0	0	1	1	1	1	0.113712	0.038171	4.467	3.68383	0.0255528
3	35	0	67	1	1	1	1	0	0	0	0.227072	0.0363616	2.479	1.98889	0.0185584
2	30	0	84	1	1	0	1	1	1	1	0.103725	0.0899106	2.487	7.93466	0.0683195
2	50	0	79	0	1	0	0	1	0	0	0.302731	0.0704743	1.415	3.19586	0.0170891
2	64	0	66	0	0	0	1	1	0	0	0.110172	0.0273678	7.5	3.49358	0.0331787
2	60	0	70	0	0	0	1	0	1	1	0.275265	0.0318996	0.458	2.21706	0.0183796
2	33	1	59	1	0	0	1	1	0	0	0.108863	0.0160223	13.29	0.776968	0.0360551
2	20	1	75	1	0	0	1	1	0	1	0.180712	0.0108222	1.849	0.823094	0.0217363
2	26	0	23	0	0	0	1	1	1	1	0.18457	0.00619946	1.442	9.07621	0.0691919
2	30	1	77	1	1	0	1	0	0	1	0.272935	0.0147486	1.132	2.58558	0.0265313
2	68	0	66	1	0	0	0	0	0	0	0.171883	0.0240781	5	2.64505	0.0263405
2	36	0	62	1	0	0	1	0	0	0	0.155265	0.0310128	2.056	3.03924	0.0471545
3	20	0	72	1	1	0	1	0	0	0	0.238354	0.0230638	3.286	2.66135	0.0172673
2	43	1	61	0	0	0	1	1	1	0	0.105522	0.0257898	25.25	2.81926	0.0656719
2	46	0	57	1	0	0	1	0	0	1	0.223778	0.017592	2.75	3.44814	0.0149371
2	63	0	77	1	0	0	1	0	0	1	0.0196418	0.0127478	3.558	4.87391	0.0457969
2	40	0	67	1	0	0	1	0	0	0	0.315391	0.0460291	0.513	3.57439	0.0515572
2	30	1	44	1	1	0	1	1	0	0	0.242204	0.0195631	5.957	3.80133	0.00856504
3	26	0	52	1	0	0	1	1	1	0	0.169115	0.0168424	1.096	2.96837	0.0239558
2	39	0	44	1	0	0	1	0	1	0	0.299484	0.0118848	2.286	3.56544	0.0567573
2	20	1	63	1	0	0	1	1	0	1	0.235733	0.0138928	0.993	3.55736	0.0797373
3	31	1	74	0	1	0	1	1	1	0	0.181172	0.0777078	17.6	2.25184	0.0584491
2	25	0	46	1	0	0	1	1	1	0	0.316196	0.0110994	3.591	3.61503	0.0330844
2	20	1	50	1	0	1	0	1	0	0	0.163856	0.0132342	0.671	2.83928	0.0382339
2	49	0	40	0	1	0	1	1	0	0	0.193666	0.0238552	11.333	3.46243	0.0489204
2	20	0	58	0	0	0	1	1	1	1	0.348713	0.00801626	0.176	5.26377	0.0728049
2	70	0	73	0	1	0	0	1	1	0	0.225607	0.00884384	5	1.97311	0.0492248
3	35	1	69	0	1	0	1	1	1	0	0.265202	0.0296557	2.356	2.35619	0.0407932
2	20	1	54	1	0	0	1	1	0	0	0.197212	0.0475082	4.912	3.3312	0.0398551
2	38	1	78	1	0	0	1	1	0	1	0.217216	0.0292634	0.821	1.45012	0.0450244
2	36	0	53	1	0	0	1	1	1	0	0.169876	0.0107613	2.405	2.70628	0.0362428
2	35	1	78	1	0	0	1	1	0	0	0.172021	0.0890582	2.2	1.9655	0.0996864
2	57	0	77	1	0	0	0	1	0	0	0.220557	0.0250153	2.714	10.0821	0.0201531
2	42	1	81	1	1	0	0	1	0	0	0.130544	0.00486033	3.101	2.74085	0.0143817
2	32	1	62	0	0	0	1	1	0	0	0.203039	-0.00102903	0.515	2.9247	0.0366985
3	25	0	56	1	1	0	1	0	0	0	0.297735	0.125564	0.183	2.16614	0.0611285
3	24	1	60	0	1	0	1	1	0	0	0.263308	0.0303665	1.593	2.43185	0.0416667
2	30	1	46	1	0	0	1	1	1	0	0.269292	0.0227687	25.33	2.79965	0.0384871
2	30	1	52	1	1	0	1	1	1	0	0.352929	0.0330847	1.412	3.11372	0.0530423
2	60	0	40	0	0	0	1	1	0	0	0.208254	0.0170771	15.694	2.61365	0.0271806
2	40	1	71	1	0	0	1	1	0	0	0.111294	-0.0065503	2.773	3.32575	0.0575214
2	30	1	59	1	0	0	1	0	1	1	0.220826	0.0320861	1.324	4.64005	0.0533001
2	35	0	31	1	0	0	1	1	0	0	0.337342	0.00934504	3	3.05354	0.0243688
2	21	0	63	1	0	0	1	1	0	0	0.100863	0.0121767	6.5	2.25081	0.0419202
2	45	1	57	1	0	0	1	0	0	0	0.231716	0.00351047	5.717	1.75248	0.0274295
2	35	1	59	1	0	0	1	1	0	0	0.227682	0.0339029	2.639	3.11396	0.0188889
2	40	1	70	1	1	0	1	1	1	0	0.166149	0.0287354	5.081	2.46906	0.0420036
3	30	1	68	1	1	1	1	0	0	0	0.187853	0.0190747	1.591	3.33679	0.0462605
2	25	1	74	0	0	0	1	1	1	0	0.187079	0.0967679	3.63	4.18173	0.0497312
2	35	0	69	1	0	0	0	1	1	0	0.214243	0.066227	0.913	2.352	0.0323096
3	56	0	66	0	1	0	1	1	0	0	0.245416	0.0700299	10	4.64853	0.0188131
3	60	0	69	0	1	0	1	0	0	0	0.408823	0.144248	1.597	1.95288	0.0752564
2	41	1	51	1	0	0	1	1	0	0	0.0793938	-0.0435994	3.692	2.60365	0.028125
3	27	0	80	0	0	0	1	0	0	1	0.299047	0.0260953	0.589	6.02106	0.0285904
2	32	1	66	1	1	0	1	1	1	0	0.0980933	-0.00675631	2.393	3.1941	0.0414244
2	33	1	68	0	1	0	0	1	0	0	0.362051	0.06654	2.205	1.84674	0.0279345
2	35	1	69	1	1	0	1	1	0	0	0.21463	-0.0185557	0.294	2.39698	0.0161441
2	35	0	68	0	0	0	1	1	0	1	0.216572	0.0485946	2.246	5.33264	0.0578209
2	40	1	67	1	0	0	1	0	0	0	0.260489	0.0373062	33	3.68685	0.0336922
2	69	0	73	1	1	0	1	1	0	0	0.142452	0.00997596	10.5	2.72381	0.016178
2	55	0	73	0	0	0	1	1	1	0	0.216431	0.0560386	4.665	2.30693	0.0210449
2	51	1	58	1	0	0	1	1	1	1	0.17252	0.00130607	2.784	3.72323	0.0306604
2	35	0	71	0	0	0	1	1	1	1	0.361282	0.0339829	1.92	2.29756	0.057369
3	37	1	72	1	0	0	1	0	0	0	0.0815012	-0.00439333	1.868	1.94467	0.0312098
2	29	1	58	1	1	0	0	1	0	0	0.243411	0.0247949	6.889	2.78175	0.0213922
3	20	1	72	1	0	0	1	0	0	1	0.313197	0.0263415	0.107	2.5211	0.0597701
2	25	1	68	1	1	0	1	1	1	0	0.163108	0.0309573	3.125	1.96659	0.0255751
2	24	1	64	0	1	0	1	1	1	0	0.230997	0.0546414	2.361	2.99945	0.0521296
